# Supplementary material for: Characterisation of digital therapeutic clinical trials: a systematic review with natural language processing
Source: PubMed Central journal article supplement (PMC11074920; doi:10.1016/s2589-7500(23)00244-3), 2024-03
Supplement: NIHMS1979894-supplement-Supp_data.pdf [file NIHMS1979894-supplement-Supp_data.pdf]

# THE LANCET

## Digital Health

### Supplementary appendix

This appendix formed part of the original submission and has been peer reviewed. We post it as supplied by the authors.

Supplement to: Miao BY, Sushil M, Xu A, et al. Characterisation of digital therapeutic clinical trials: a systematic review with natural language processing. *Lancet Digit Health* 2024; **6**: e222–29.

## Contents of supplementary figures and tables

|                |    |
|----------------|----|
| Table S1.....  | 1  |
| Figure S1..... | 2  |
| Figure S2..... | 3  |
| Figure S3..... | 4  |
| Table S2.....  | 5  |
| Table S3.....  | 7  |
| Table S4.....  | 8  |
| Table S5.....  | 9  |
| Table S6.....  | 10 |
| Table S7.....  | 11 |
| Figure S4..... | 12 |

**Supplementary figures**

**Table S1. Number of search results returned from ClinicalTrials.gov for each DTx-associated term.**

| Search term             | Number of studies |
|-------------------------|-------------------|
| "digital therapeutic"   | 76                |
| "digital therapy"       | 33                |
| "digital therapies"     | 33                |
| "mobile health"         | 1598              |
| "smartphone"            | 3219              |
| "smart phone"           | 3219              |
| "digital intervention"  | 156               |
| "mobile platform"       | 53                |
| "mobile app"            | 1834              |
| "mobile device"         | 462               |
| "study app"             | 48                |
| "digital treatment"     | 27                |
| "android"               | 401               |
| " app."                 | 1265              |
| " app,"                 | 766               |
| "digital tablet"        | 21                |
| " ios"                  | 340               |
| "iphone"                | 219               |
| "smart watch"           | 83                |
| "smartwatch"            | 140               |
| "virtual reality"       | 1747              |
| "video game"            | 598               |
| "digital health"        | 388               |
| "mobile video"          | 12                |
| "digital platform"      | 120               |
| "software intervention" | 7                 |
| "software treatment"    | 8                 |

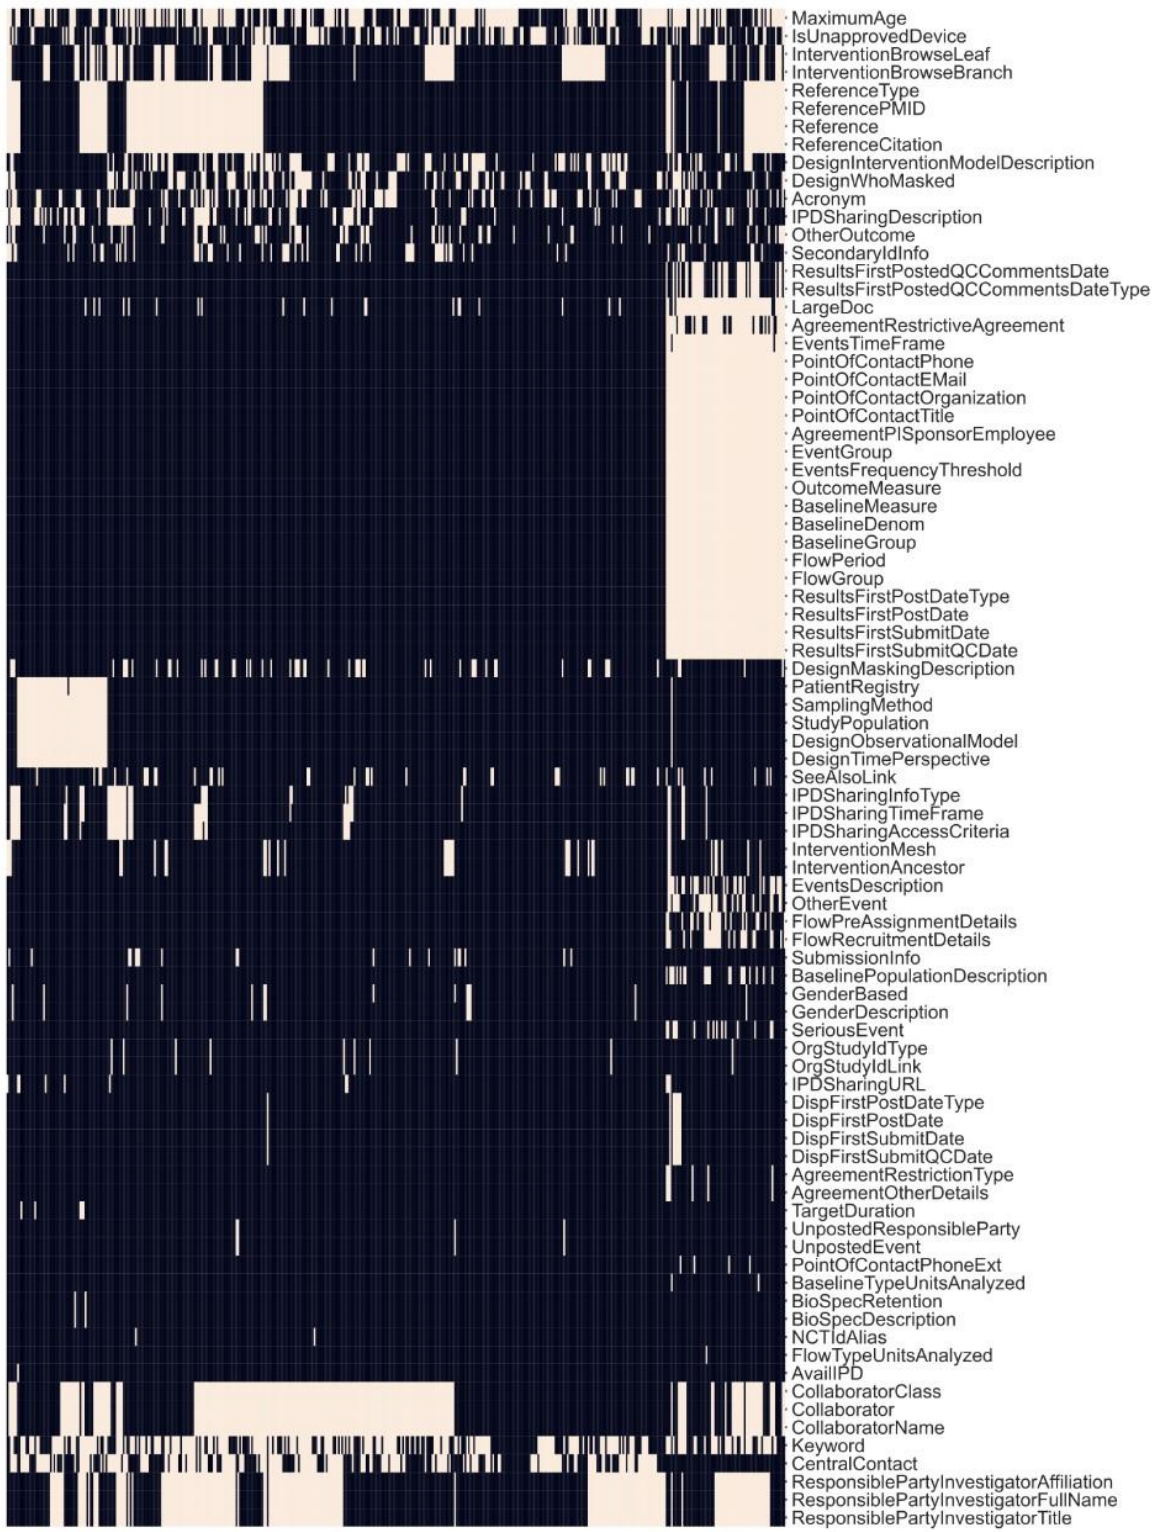

**Figure S1. Missing values in DTx clinical trials for each data field.** Only data fields where at least 1 trial contains a missing value is shown. Black bars indicate missing data.

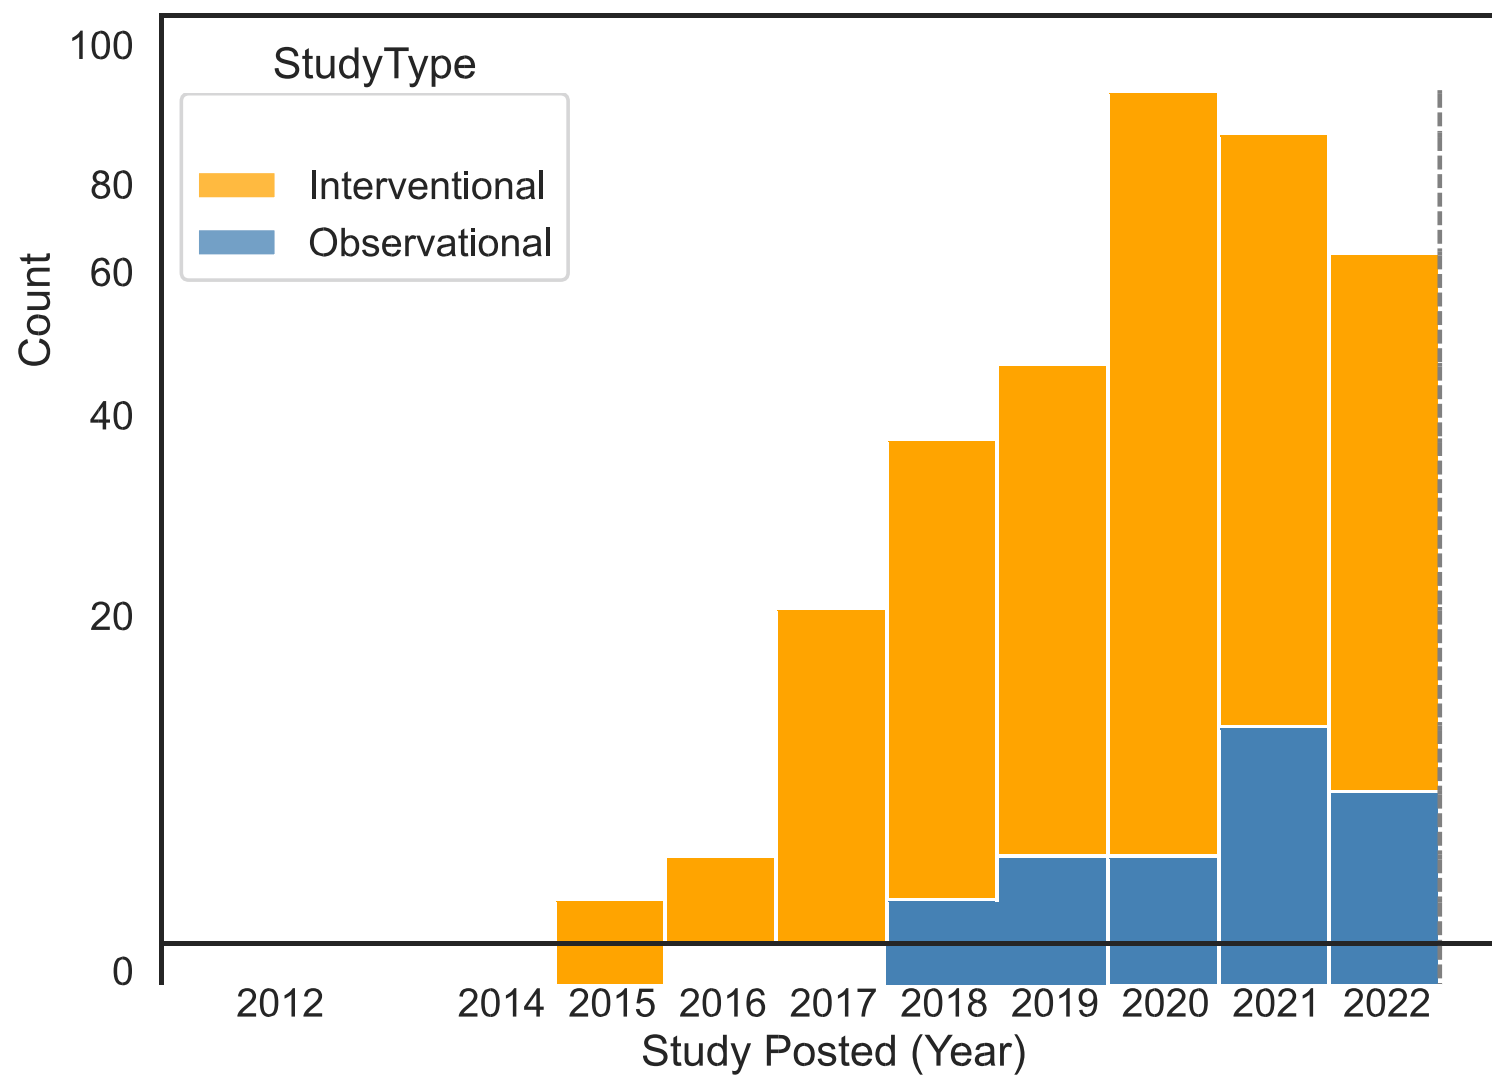

Figure S2. Distribution of study post dates for digital therapeutic clinical trials.

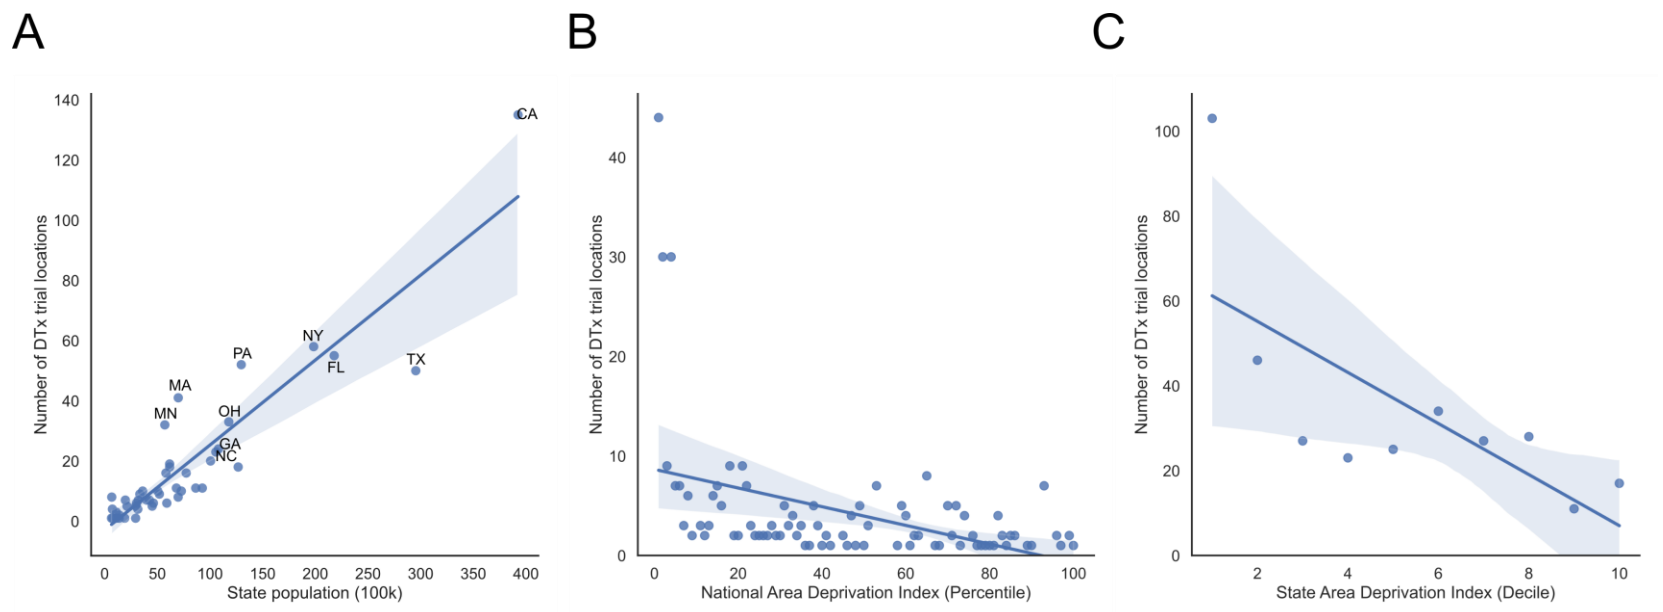

**Figure S3: Correlation between number of DTx clinical trial locations and geographic characteristics.** A) Correlation between number of DTx clinical trials and state population. The top 10 states with the highest number of DTx clinical trials are labeled. Within the top 5 states, we also looked at the relationship between number of DTx trial locations and area deprivation index (ADI) at the B) national level and C) state level. The national ADI is calculated relative to other zip codes in the United States, while the state ADI is relative to other zip codes in the state. Higher ADI scores at both the national and state level indicate greater socioeconomic disadvantage.

**Table S2: Incorrect MeSH branches selected by SciSpacy EntityLinker.**

| Clinical Trial | Condition (ClinicalTrials.gov)                                                                                                                                                                                                                    | MeSH branch (SciSpacy EntityLinker)         | Incorrect (“N”) or “Multiple” possible MeSH Branches |
|----------------|---------------------------------------------------------------------------------------------------------------------------------------------------------------------------------------------------------------------------------------------------|---------------------------------------------|------------------------------------------------------|
| NCT03934658    | ['PostTraumatic Stress Disorder' 'Sleep Disorder' 'Stress Disorder' 'Sleep Initiation and Maintenance Disorders' 'Combat Disorders' 'Nightmares Associated With Chronic Post-Traumatic Stress Disorder' 'Nightmare' 'Nightmares, REM-Sleep Type'] | Psychological Phenomena                     | N                                                    |
| NCT03828656    | ['PostTraumatic Stress Disorder' 'Sleep Disorder' 'Stress Disorder' 'Sleep Initiation and Maintenance Disorders' 'Combat Disorders' 'Nightmares Associated With Chronic Post-Traumatic Stress Disorder' 'Nightmare' 'Nightmares, REM-Sleep Type'] | Psychological Phenomena                     | N                                                    |
| NCT03795987    | ['Stress Disorders, Post-Traumatic' 'Combat Disorders' 'Ptd' 'Nightmare' 'Nightmares, REM-Sleep Type' 'Nightmare Disorder With Associated Non-Sleep Disorder']                                                                                    | Psychological Phenomena                     | N                                                    |
| NCT04040387    | ['Stress Disorders, Post-Traumatic' 'Combat Disorders' 'Ptd' 'Nightmare' 'Nightmares, REM-Sleep Type' 'Nightmare Disorder With Associated Non-Sleep Disorder']                                                                                    | Psychological Phenomena                     | N                                                    |
| NCT04897074    | ['Attention Deficit Hyperactivity Disorder']                                                                                                                                                                                                      | Psychological Phenomena                     | N                                                    |
| NCT04418076    | ['HIV/AIDS' 'Cocaine Use']                                                                                                                                                                                                                        | Organic Chemicals                           | N                                                    |
| NCT04846777    | ['Generalized Anxiety Disorder']                                                                                                                                                                                                                  | Investigative Techniques                    | N                                                    |
| NCT03748264    | ['Sleep Disordered Breathing']                                                                                                                                                                                                                    | Psychological Phenomena                     | N                                                    |
| NCT05077644    | ['Post-partum Depression']                                                                                                                                                                                                                        | Urogenital Diseases                         | N                                                    |
| NCT04364256    | ['Autologous Hematopoietic Stem Cell Transplant']                                                                                                                                                                                                 | Biological Factors                          | N                                                    |
| NCT04684823    | ['Cystic Fibrosis' 'Adherence, Medication']                                                                                                                                                                                                       | Digestive System Diseases                   | N                                                    |
| NCT03047720    | ['Nocturnal Enuresis']                                                                                                                                                                                                                            | Heterocyclic Compounds                      | N                                                    |
| NCT03649074    | ['Attention Deficit Hyperactivity Disorder']                                                                                                                                                                                                      | Psychological Phenomena                     | N                                                    |
| NCT03678402    | ['High Risk for Falling']                                                                                                                                                                                                                         | Investigative Techniques                    | N                                                    |
| NCT04429009    | ['Thoracic Surgery' 'Respiratory Therapy']                                                                                                                                                                                                        | Health Occupations                          | N                                                    |
| NCT05147987    | ['Insufficient Lactation']                                                                                                                                                                                                                        | Urogenital Diseases                         | N                                                    |
| NCT05454813    | ['System Validation']                                                                                                                                                                                                                             | Hemic and Immune Systems                    | N                                                    |
| NCT04584970    | ['Scoliosis Idiopathic' 'Pain, Postoperative']                                                                                                                                                                                                    | Infections                                  | N                                                    |
| NCT05150197    | ['Visual Field Defect, Peripheral']                                                                                                                                                                                                               | Diagnosis                                   | N                                                    |
| NCT04416555    | ['Postoperative Pain']                                                                                                                                                                                                                            | Therapeutics                                | N                                                    |
| NCT04268901    | ['Phlebotomy' 'Orthopedics' 'Radiology' 'Pain' 'Anxiety' 'Virtual Reality' 'Allergy' 'Gastroenterology']                                                                                                                                          | Immune System Diseases                      | N                                                    |
| NCT04175444    | ['Visual Field Defect, Peripheral']                                                                                                                                                                                                               | Diagnosis                                   | N                                                    |
| NCT04025814    | ['Attention Deficit Hyperactivity Disorder']                                                                                                                                                                                                      | Psychological Phenomena                     | N                                                    |
| NCT04857515    | ['Smoking Cessation' 'Smoking Behaviors' 'Smoking Reduction' 'Smoking, Cigarette' 'Smoking' 'Nicotine Dependence']                                                                                                                                | Behavior and Behavior Mechanisms            | Multiple                                             |
| NCT05365607    | ['Posttraumatic Stress Disorder' 'Cardiovascular Diseases' 'Autonomic Dysfunction' 'Vascular Stiffness' 'Nightmare' 'Endothelial Dysfunction']                                                                                                    | Mental Disorders                            | Multiple                                             |
| NCT03340311    | ['Gestational Diabetes Mellitus']                                                                                                                                                                                                                 | Urogenital Diseases                         | Multiple                                             |
| NCT04808609    | ['Smoking Cessation' 'Smoking' 'Smoking Behaviors' 'Smoking Reduction' 'Smoking, Tobacco' 'Smoking, Cigarette' 'Hiv' 'HIV/AIDS']                                                                                                                  | Behavior and Behavior Mechanisms            | Multiple                                             |
| NCT04609514    | ['HIV/AIDS' 'Smoking Cessation' 'Tobacco Use Disorder']                                                                                                                                                                                           | Behavior and Behavior Mechanisms            | Multiple                                             |
| NCT04854798    | ['Covid19' 'Cytokine Storm' 'Inflammation']                                                                                                                                                                                                       | Pathological Conditions, Signs and Symptoms | Multiple                                             |
| NCT04701489    | ['Covid19' 'Cytokine Storm' 'Inflammation']                                                                                                                                                                                                       | Pathological Conditions, Signs and Symptoms | Multiple                                             |
| NCT04838925    | ['Chronic Pain' 'Opioid Use']                                                                                                                                                                                                                     | Pathological Conditions, Signs and Symptoms | Multiple                                             |
| NCT04217551    | ['Cardiac Arrest, Out-Of-Hospital' 'Hypothermia, Induced' 'Hypoxia-Ischemia, Brain']                                                                                                                                                              | Pathological Conditions, Signs and Symptoms | Multiple                                             |
| NCT04332718    | ['Stroke' 'Atrial Fibrillation']                                                                                                                                                                                                                  | Nervous System Diseases                     | Multiple                                             |
| NCT03519451    | ['Depression' 'Tobacco Use Disorder' 'Current Every Day Smoker']                                                                                                                                                                                  | Behavior and Behavior Mechanisms            | Multiple                                             |
| NCT03475147    | ['Scotoma']                                                                                                                                                                                                                                       | Nervous System Diseases                     | Multiple                                             |
| NCT04465682    | ['Urine Detectable Acute and Chronic Diseases']                                                                                                                                                                                                   | Pathological Conditions, Signs and Symptoms | Multiple                                             |
| NCT04297969    | ['Amblyopia Bilateral' 'Hyperopia of Both Eyes' 'Astigmatism Bilateral' 'Accommodation Disorder']                                                                                                                                                 | Nervous System Diseases                     | Multiple                                             |
| NCT04607460    | ['Chronic Low-back Pain' 'Mastectomy' 'Lumpectomy' 'Migraine']                                                                                                                                                                                    | Nervous System Diseases                     | Multiple                                             |
| NCT04659564    | ['Breast Cancer Related Lymphedema' 'Lymphedema of Upper Arm' 'Lymphedema' 'Quality of Life']                                                                                                                                                     | Hemic and Lymphatic Diseases                | Multiple                                             |

|                    |                                                                                                                                                                                                             |                                             |          |
|--------------------|-------------------------------------------------------------------------------------------------------------------------------------------------------------------------------------------------------------|---------------------------------------------|----------|
| <b>NCT03506568</b> | ['Medication Adherence' 'Glaucoma']                                                                                                                                                                         | Behavior and Behavior Mechanisms            | Multiple |
| <b>NCT04205370</b> | ['Sleep' 'Pregnancy Complications']                                                                                                                                                                         | Psychological Phenomena                     | Multiple |
| <b>NCT04721067</b> | ['Hiv' 'Insomnia']                                                                                                                                                                                          | Nervous System Diseases                     | Multiple |
| <b>NCT05212129</b> | ['Functional Gastrointestinal Disorders'<br>'Hypermobile Ehlers-Danlos Syndrome'<br>'Postural Orthostatic Tachycardia Syndrome'<br>'Autonomic Nervous System Disease' 'Autonomic Nervous System Imbalance'] | Nervous System Diseases                     | Multiple |
| <b>NCT05099874</b> | ['Sickle Cell Disease' 'Attention Deficit'<br>'Cognitive Deficit in Attention']                                                                                                                             | Hemic and Lymphatic Diseases                | Multiple |
| <b>NCT05427734</b> | ['Suicide' 'Suicide, Attempted' 'Suicidal Ideation' 'Alcohol Use Disorder'<br>'Alcoholism' 'Alcohol Abuse' 'Screening and Brief Interventions']                                                             | Chemically-Induced Disorders                | Multiple |
| <b>NCT03905863</b> | ['Diabetic Foot Ulcer' 'Surgical Wound']                                                                                                                                                                    | Cardiovascular Diseases                     | Multiple |
| <b>NCT05378399</b> | ['HIV Infections' 'Substance Use' 'Adherence, Medication'<br>'Adherence, Treatment']                                                                                                                        | Behavior and Behavior Mechanisms            | Multiple |
| <b>NCT05130112</b> | ['Small Airway Disorders' 'COPD']                                                                                                                                                                           | Pathological Conditions, Signs and Symptoms | Multiple |
| <b>NCT04169282</b> | ['Tracheobronchomalacia']                                                                                                                                                                                   | Musculoskeletal Diseases                    | Multiple |
| <b>NCT05473702</b> | ['Heart Disease Chronic' 'Pulmonary Disease, Chronic Obstructive'<br>'Blood Pressure' 'Heart Rhythm Disorder']                                                                                              | Respiratory Tract Diseases                  | Multiple |
| <b>NCT05212363</b> | ['Compression; Vein' 'Compression; Artery' 'Sedentary Behavior'<br>'DVT of Legs']                                                                                                                           | Behavior and Behavior Mechanisms            | Multiple |



**Table S3: Studies with conditions not mapped to MeSH headings by SciSpacy EntityLinker.**

| <b>Clinical Trial</b> | <b>Study Official Title</b>                                                                                                                                                                       | <b>Condition</b>  |
|-----------------------|---------------------------------------------------------------------------------------------------------------------------------------------------------------------------------------------------|-------------------|
| <b>NCT04887922</b>    | The Effect of Preoperative and Postoperative Incentive Spirometry in Patients Undergoing Major Abdominal Surgery                                                                                  | Abdominal Surgery |
| <b>NCT04910139</b>    | A User Study of the Soniflow System for Nasal Congestion Relief                                                                                                                                   | Nasal Congestion  |
| <b>NCT02091882</b>    | OSMITTER 316-13-206A Substudy: A Substudy to Measure the Accuracy of Ingestible Event Marker (IEM) Detection by the Medical Information Device #1 (MIND1) System and Determine the Latency Period | Device Latency    |
| <b>NCT05052281</b>    | Promoting Healthy Brain Development Via Prenatal Stress Reduction: An Innovative Precision Medicine Approach                                                                                      | Prenatal Stress   |
| <b>NCT05099614</b>    | Naloxone Administration Via Auto -injection in Healthy Volunteers                                                                                                                                 | Overdose Antidote |
| <b>NCT05199844</b>    | Accuracy of Apple Watch to Measure Cardiovascular Indices in Patients With Cardiac Diseases: Observational Study                                                                                  | Apple Watch       |

**Table S4: Keyword components comprising each inclusion criteria topic.**

| Topic name               | MeSH Category                               | Proportion    | Components                                                                                      |
|--------------------------|---------------------------------------------|---------------|-------------------------------------------------------------------------------------------------|
| <b>Clinical factors</b>  | Pathological Conditions, Signs and Symptoms | 21/38 (55.3%) | pain, months, sleep, scale, 10                                                                  |
|                          | Nervous System Diseases                     | 31/66 (47.0%) | pain, score, month, months, insomnia<br>treatment, medication, score, stable, month             |
|                          | Mental Disorders                            | 11/24 (45.8%) |                                                                                                 |
|                          | Nutritional and Metabolic Diseases          | 15/38 (39.5%) | smbg, participants, months, prior, therapy                                                      |
|                          | Cardiovascular Diseases                     | 8/24 (33.3%)  | score, states, resident, vasc, patients<br>treatment, 20th, percentile, systemic,<br>having     |
|                          | Neoplasms                                   | 5/17 (29.4%)  |                                                                                                 |
| <b>Informed consent</b>  | Behavior and Behavior Mechanisms            | 9/32 (28.1%)  | pain, usa, average, baseline, reported                                                          |
|                          | Nutritional and Metabolic Diseases          | 24/38 (63.2%) | consent, informed, willing, provide, hipaa<br>consent, informed, provide, willing, required     |
|                          | Behavior and Behavior Mechanisms            | 18/32 (56.2%) |                                                                                                 |
|                          | Neoplasms                                   | 9/17 (52.9%)  | consent, informed, written, provide, willing                                                    |
|                          | Nervous System Diseases                     | 32/66 (48.5%) | consent, informed, provide, willing, able                                                       |
|                          | Pathological Conditions, Signs and Symptoms | 16/38 (42.1%) | consent, informed, provide, willing, signed                                                     |
| <b>Age (&gt;18)</b>      | Mental Disorders                            | 9/24 (37.5%)  | consent, informed, provide, willing, able                                                       |
|                          | Cardiovascular Diseases                     | 6/24 (25.0%)  | informed, consent, ascertained, able, valid                                                     |
|                          | Behavior and Behavior Mechanisms            | 23/32 (71.9%) | 18, years, age, old, ages                                                                       |
|                          | Nutritional and Metabolic Diseases          | 25/38 (65.8%) | years, age, 18, old, male                                                                       |
|                          | Pathological Conditions, Signs and Symptoms | 25/38 (65.8%) | 18, years, age, aged, old                                                                       |
|                          | Cardiovascular Diseases                     | 14/24 (58.3%) | 18, years, age, older, male                                                                     |
|                          | Nervous System Diseases                     | 38/66 (57.6%) | years, age, 18, old, aged                                                                       |
| <b>Smartphone access</b> | Mental Disorders                            | 13/24 (54.2%) | years, 18, age, 22, older                                                                       |
|                          | Neoplasms                                   | 6/17 (35.3%)  | years, 18, age, old, mole                                                                       |
|                          | Nutritional and Metabolic Diseases          | 18/38 (47.4%) | smartphone, device, mobile, phone,<br>compatible                                                |
|                          | Neoplasms                                   | 8/17 (47.1%)  | smartphone, access, recorded, audio,<br>mobile                                                  |
|                          | Behavior and Behavior Mechanisms            | 12/32 (37.5%) | smartphone, android, access, iphone, ios<br>smartphone, iphone, game, android,<br>controller    |
|                          | Mental Disorders                            | 7/24 (29.2%)  |                                                                                                 |
|                          | Cardiovascular Diseases                     | 6/24 (25.0%)  | smartphone, plan, data, wi, fi                                                                  |
| <b>English fluency</b>   | Nervous System Diseases                     | 11/66 (16.7%) | smartphone, access, device, holds, license<br>comfortable, complete, zoom, conferencing,<br>web |
|                          | Pathological Conditions, Signs and Symptoms | 2/38 (5.3%)   |                                                                                                 |
|                          | Behavior and Behavior Mechanisms            | 11/32 (34.4%) | english, fluency, read, speaking, literacy                                                      |
|                          | Nutritional and Metabolic Diseases          | 12/38 (31.6%) | english, read, speaking, speak, write                                                           |
|                          | Neoplasms                                   | 5/17 (29.4%)  | english, read, speak, speaking, write<br>english, speaking, read, understand, spanish           |
|                          | Pathological Conditions, Signs and Symptoms | 10/38 (26.3%) |                                                                                                 |
|                          | Cardiovascular Diseases                     | 6/24 (25.0%)  | english, speaking, read, write, speak                                                           |
| <b>English fluency</b>   | Mental Disorders                            | 6/24 (25.0%)  | english, speaking, proficient, read, language                                                   |
|                          | Nervous System Diseases                     | 15/66 (22.7%) | english, speaking, read, spanish, speak                                                         |

**Table S5: Keyword components comprising each exclusion criteria topic.**

| Topic name                                 | MeSH Category                               | Proportion    | Components                                           |
|--------------------------------------------|---------------------------------------------|---------------|------------------------------------------------------|
| <b>Medical history</b>                     | Mental Disorders                            | 23/24 (95.8%) | disorder, suicidal, use, current, months             |
|                                            | Pathological Conditions, Signs and Symptoms | 33/38 (86.8%) | disorder, history, severe, current, use              |
|                                            | Cardiovascular Diseases                     | 20/24 (83.3%) | heart, weeks, patients, cardiac, disorder            |
|                                            | Nervous System Diseases                     | 55/66 (83.3%) | disorder, history, severe, disease, months           |
|                                            | Nutritional and Metabolic Diseases          | 31/38 (81.6%) | insulin, disease, disorder, months, investigator     |
|                                            | Behavior and Behavior Mechanisms            | 26/32 (81.2%) | disorder, current, smoking, suicidal, treatment      |
|                                            | Neoplasms                                   | 13/17 (76.5%) | disorder, history, care, therapy, psychiatric        |
| <b>Pregnancy</b>                           | Nutritional and Metabolic Diseases          | 21/38 (55.3%) | pregnant, pregnancy, women, female, feeding          |
|                                            | Pathological Conditions, Signs and Symptoms | 12/38 (31.6%) | pregnant, pregnancy, teeth, women, face              |
|                                            | Behavior and Behavior Mechanisms            | 9/32 (28.1%)  | pregnant, planning, face, pregnancy, comfortable     |
|                                            | Nervous System Diseases                     | 18/66 (27.3%) | pregnant, pregnancy, women, breastfeeding, potential |
|                                            | Neoplasms                                   | 4/17 (23.5%)  | pregnant, adults, populations, vulnerable, prisoners |
|                                            | Mental Disorders                            | 5/24 (20.8%)  | pregnant, pregnancy, teenagers, cycles, menstrual    |
|                                            | Cardiovascular Diseases                     | 3/24 (12.5%)  | postpartum, wfbmc, center, location, birth           |
| <b>Allergies or other skin conditions</b>  | Neoplasms                                   | 5/17 (29.4%)  | cancer, documented, skin, patients, hematologic      |
|                                            | Nutritional and Metabolic Diseases          | 11/38 (28.9%) | skin, cell, allergy, basal, neoplasms                |
|                                            | Pathological Conditions, Signs and Symptoms | 7/38 (18.4%)  | skin, cancer, carcinoma, sores, hardware             |
|                                            | Behavior and Behavior Mechanisms            | 4/32 (12.5%)  | skin, fragile, dermatologic, intact, oozing          |
|                                            | Cardiovascular Diseases                     | 3/24 (12.5%)  | wound, patches, surface, adhesive, skin              |
|                                            | Mental Disorders                            | 2/24 (8.3%)   | cancers, skin, cvd, preexisting, angiomas            |
|                                            | Nervous System Diseases                     | 5/66 (7.6%)   | allergic, skin, known, tapes, reaction               |
| <b>Cardiovascular metrics</b>              | Cardiovascular Diseases                     | 8/24 (33.3%)  | mmhg, diastolic, cm, baseline, dl                    |
|                                            | Nutritional and Metabolic Diseases          | 9/38 (23.7%)  | mmhg, pressure, 60, ml, min                          |
|                                            | Pathological Conditions, Signs and Symptoms | 4/38 (10.5%)  | inches, 79, clots, obesity, circumference            |
|                                            | Nervous System Diseases                     | 5/66 (7.6%)   | mmhg, 60, diastolic, 30, cm                          |
|                                            | Neoplasms                                   | 1/17 (5.9%)   | mass, 35, bmi, index, body                           |
|                                            | Mental Disorders                            | 1/24 (4.2%)   | tsh, thyroid, pcp, mu, values                        |
| <b>Ability to provide informed consent</b> | Neoplasms                                   | 5/17 (29.4%)  | consent, informed, sign, willing, inability          |
|                                            | Cardiovascular Diseases                     | 3/24 (12.5%)  | consent, provide, informed, inability, unwilling     |
|                                            | Nervous System Diseases                     | 8/66 (12.1%)  | consent, informed, provide, written, unable          |
|                                            | Nutritional and Metabolic Diseases          | 4/38 (10.5%)  | consent, informed, inability, provide, unwillingness |
|                                            | Pathological Conditions, Signs and Symptoms | 3/38 (7.9%)   | consent, informed, provide, inability, unable        |
|                                            | Behavior and Behavior Mechanisms            | 2/32 (6.2%)   | informed, consent, inability, provide, unwillingness |
|                                            | Mental Disorders                            | 1/24 (4.2%)   | consent, informed, adults, unable, written           |

**Table S6: Incorrect values from manual assessment of topic modeling in a subset of 200 inclusion eligibility criteria.**

| <b>NCTid</b>       | <b>Inclusion Criteria (Preprocessed)</b>                                                                                                                                                                                                                                                                                                                                                      | <b>BERTopic cluster</b>             | <b>Expected cluster</b>             |
|--------------------|-----------------------------------------------------------------------------------------------------------------------------------------------------------------------------------------------------------------------------------------------------------------------------------------------------------------------------------------------------------------------------------------------|-------------------------------------|-------------------------------------|
| <b>NCT03142932</b> | agree anticipate living baltimore 2 months                                                                                                                                                                                                                                                                                                                                                    | Clinical factors                    | Other                               |
| <b>NCT04380415</b> | u.s. resident                                                                                                                                                                                                                                                                                                                                                                                 | Clinical factors                    | Other                               |
| <b>NCT03214224</b> | 1                                                                                                                                                                                                                                                                                                                                                                                             | Clinical factors                    | NA                                  |
| <b>NCT03418129</b> | served military branches army navy marines air force coast guard october 2001.                                                                                                                                                                                                                                                                                                                | Clinical factors                    | Other                               |
| <b>NCT03335800</b> | current resident united states time eligibility screening defined self reported state residence 50 states united states district columbia.                                                                                                                                                                                                                                                    | Clinical factors                    | Other                               |
| <b>NCT04524598</b> | residing usa duration 5 week                                                                                                                                                                                                                                                                                                                                                                  | Clinical factors                    | Other                               |
| <b>NCT04268914</b> | 4. children normal range development recruited study. assessed report parents. rationale excluding patients developmental delay cognitive impairments children react stressors surgery differently children developmental delay. unclear children use preparation programs interventions included likely responses baseline outcome measures differ children normal developmental parameters. | Clinical factors                    | Ability to provide informed consent |
| <b>NCT04253691</b> | unable complete forms implement treatment cognitive impairment mmse<26                                                                                                                                                                                                                                                                                                                        | Clinical factors                    | Ability to provide informed consent |
| <b>NCT04607460</b> | able speak understand english 6 access computer tablet home email address.                                                                                                                                                                                                                                                                                                                    | Ability to provide informed consent | English fluency                     |
| <b>NCT03335800</b> | valid phone number associated iphone ascertained self report.                                                                                                                                                                                                                                                                                                                                 | Ability to provide informed consent | Smartphone access                   |
| <b>NCT03338036</b> | holds valid driver s license                                                                                                                                                                                                                                                                                                                                                                  | Smartphone access                   | Other                               |

**Table S7: Incorrect values from manual assessment of topic modeling in a subset of 200 exclusion eligibility criteria.**

| <b>NCTid</b>       | <b>Inclusion Criteria (Preprocessed)</b>                                                                                 | <b>BERTopic cluster</b>            | <b>Expected cluster</b>             |
|--------------------|--------------------------------------------------------------------------------------------------------------------------|------------------------------------|-------------------------------------|
| <b>NCT05263037</b> | members household                                                                                                        | Medical history                    | Other                               |
| <b>NCT04394754</b> | incarceration                                                                                                            | Medical history                    | Other                               |
| <b>NCT03528174</b> | hematocrit 36 men 32 women.                                                                                              | Pregnancy                          | Cardiovascular metrics              |
| <b>NCT04479735</b> | refuses lidocaine 2.5 prilocaine 2.5 cream use excluded study.                                                           | Medical history                    | Ability to provide informed consent |
| <b>NCT05293275</b> | injury eyes face neck impedes comfortable use virtual reality                                                            | Medical history                    | Medical history                     |
| <b>NCT04797611</b> | agree use approved contraception method entirety trial                                                                   | Medical history                    | Ability to provide informed consent |
| <b>NCT05263037</b> | injury eyes face neck prevents comfortable use vr.                                                                       | Pregnancy                          | Ability to provide informed consent |
| <b>NCT04906603</b> | loss consciousness greater 30 minutes                                                                                    | Cardiovascular metrics             | Medical history                     |
| <b>NCT04230486</b> | volunteers unable complete tasks understand instructions                                                                 | Medical history                    | Ability to provide informed consent |
| <b>NCT05112432</b> | legal commitment treatment medical guardianship provision guardianship order court order allow guardian consent research | Medical history                    | Ability to provide informed consent |
| <b>NCT03315286</b> | employee direct relative employee investigational site sponsor                                                           | Medical history                    | Ability to provide informed consent |
| <b>NCT04152447</b> | injuries requiring staged surgical fixation i.e. ex fix orif                                                             | Allergies or other skin conditions | Medical history                     |
| <b>NCT03996954</b> | patients unable unwilling use device                                                                                     | Medical history                    | Ability to provide informed consent |

Search

DTx Clinical Trials

Upload custom file

**Study options**

Study Type(s)

Interventional  Observational

Study Status

Completed  Recruiting

Enrolling by invitati...  Not yet recruiting  Active, not recruiting

Study Timeframe

012 2030

2012 2030

Limit to FDA regulated devices

Sponsor Types

INDUSTRY  OTHER

FED  NIH

OTHER\_GOV

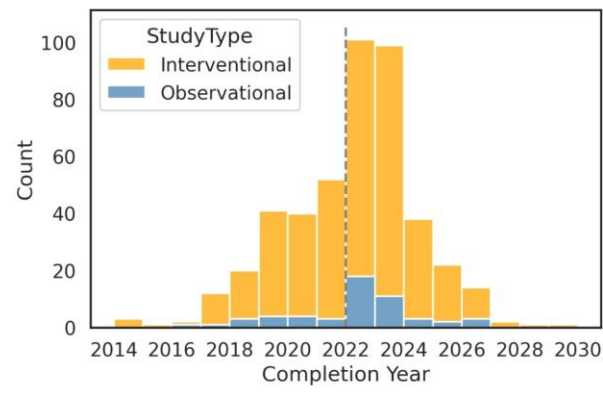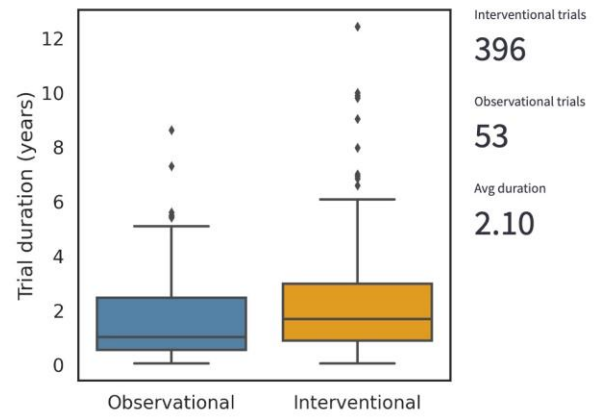

Sponsor and collaborator metrics

Primary Sponsors & Collaborator Typ

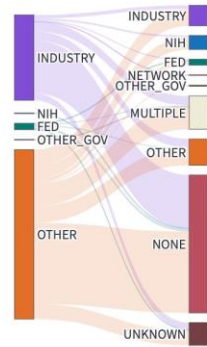

Normalize to state population

Number of clinical trial locations by state

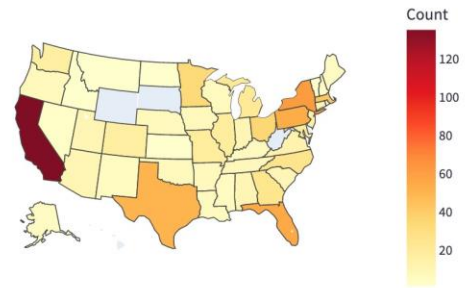

**Figure S4. Clinical trials analysis dashboard.** Screenshot of an interactive dashboard for analysis of ClinicalTrials.gov metadata for DTx clinical trials, provided for readers.
